# Supplementary material for: Tree Diversity and Community Composition of the Tutong White Sands, Brunei Darussalam: A Rare Tropical Heath Forest Ecosystem
Source: Hindawi journal article supplement (doi:10.1155/2015/807876), 2015-01-01
Supplement: f1 [file 807876.f1.pdf]

- 1    **Appendix 1:** Checklist of tree species recorded in the Tutong White Sands ( $n = 6$  plots) and  
2    the species code.  
3    (● Bornean endemic)  
4  
5    ANACARDIACEAE  
6    *Buchanania arborescens* (Blume) Blume – BUC.ARB  
7    *Gluta beccarii* (Engl.) Ding Hou – GLU.BEC  
8    *Parishia maingayi* Hook.f – PAR.MGY  
9  
10    ANISOPHYLLEACEAE  
11    *Combretocarpus rotundatus* (Miq.) Danser – COM.ROT  
12  
13    ANNONACEAE  
14    *Alphonsea* sp. – ALP.SP  
15    *Goniothalamus andersonii* J.Sinclair ● – GONI.AND  
16    *Mezzettia havilandii* (Boerl.) Ridl. – MEZ.HAV  
17    *Mezzettia umbellata* Becc. – MEZ.UMB  
18    *Polyalthia* sp. – POLY.SP  
19    *Xylopi coriifolia* Ridl. ● – XYLO.CA  
20    *Xylopi malayana* Hook.f. & Thomson – XYLO.MA  
21    *Xylopi* sp. – XYLO.SP  
22  
23    APOCYNACEAE

- 24 *Dyera polyphylla* (Miq.) Steenis – DYE.POL
- 25
- 26 AQUIFOLIACEAE
- 27 *Ilex cymosa* Blume – ILEX.CY
- 28
- 29 BONNETIACEAE
- 30 *Ploiarium alternifolium* (Vahl) Melchior – PLO.ALT
- 31
- 32 BURSERACEAE
- 33 *Santiria griffithii* Engl. – SAN.GRF
- 34 *Santiria laevigata* Blume f. *laevigata* – SAN.LAE
- 35
- 36 CALOPHYLLACEAE
- 37 *Calophyllum ardens* P.F.Stevens ● – CAL.ARD
- 38 *Calophyllum obliquinervium* Merr. – CAL.OBL
- 39 *Calophyllum cf. sclerophyllum* Vesque – CAL.SCL
- 40 *Calophyllum teysmannii* Miq. var. *inophylloide* (King) P.F. Stevens – CAL.TEY
- 41 *Kayea* sp. – KAY.SP
- 42 *Mesua* sp. – MES.SP
- 43
- 44 CASUARINACEAE
- 45 *Gymnostoma nobile* (Whitmore) L.A.S. Johnson – GYM.NOB
- 46

47 CELASTRACEAE

48 *Lophopetalum beccarianum* Pierre – LOP.BEC

49

50 CHRYSOBALANACEAE

51 *Parastemon urophyllus* (Wall. Ex A.DC.) A.DC. – PAR.URO

52

53 CLUSIACEAE

54 *Garcinia bancana* Miq. – GARC.BAN

55 *Garcinia* sp. – GARC.SP

56

57 DILLENiaceae

58 *Dillenia pulchella* (Jack) Gilg – DIL.PUL

59

60 DIPTEROCARPACEAE

61 *Cotylelobium burckii* (Heim) Heim ● – COT.BUR

62 *Dryobalanops rappa* Becc. ● – DRYO.RP

63

64 EBENACEAE

65 *Diospyros evena* Bakh. – DIO.EVE

66

67 ELAEOCARPACEAE

68 *Elaeocarpus mastersii* King – ELA.MAS

69 *Elaeocarpus pedunculatus* Wall. ex Mast. – ELA.PED

70

71 EUPHORBIACEAE

72 *Blumeodendron tokbrai* (Blume) Kurz var. *tokbrai* – BLU.TOK

73 *Macaranga caladiifolia* Becc. – MAC.CAL

74 *Pimeleodendron griffithianum* (Muell.Arg.) Benth. ex Hook.f. – PIM.GRF

75

76 FAGACEAE

77 *Lithocarpus dasystachyus* (Miq.) Rehder ● – LITH.DA

78

79 IXONANTHACEAE

80 *Ixonanthes reticulata* Jack – IXO.RET

81

82 LAURACEAE

83 *Actinodaphne borneensis* Meisn. ● – ACT.BOR

84

85 LECYTHIDACEAE

86 *Barringtonia* sp. – BAR.SP

87

88 LEGUMINOSAE-CAESALPINIOIDEAE

89 *Copaifera palustris* (Symington) De Wit ● – COP.PAL

90 *Sindora leiocarpa* Backer ex K. Heyne & De Wit – SIN.LEI

91

92 LEGUMINOSAE-PAPILIONOIDEAE

- 93 *Ormosia bancana* (Miq.) Merr. – ORM.BAN
- 94
- 95 MELASTOMATACEAE
- 96 *Memecylon lilacinum* Zoll. & Moritzi. – MEM.LIL
- 97
- 98 MYRISTICACEAE
- 99 *Horsfieldia crassifolia* (Hook.f. & Thoms.) Warb. – HORS.CR
- 100 *Knema ashtonii* J.Sinclair var. *ashtonii* ● – KNE.ASH
- 101
- 102 MYRTACEAE
- 103 *Rhodomyrtus tomentosa* (Aiton) Hassk. – RHODO.TM
- 104 *Syzygium acuminatissimum* (Blume.) DC – SYZY.AC
- 105 *Syzygium caryophylliflorum* (Ridl.) Merr. & L.M. Perry ● – SYZY.CA
- 106 *Syzygium chloranthum* (Duthie) Merr. & L.M. Perry – SYZY.CL
- 107 *Syzygium megalophyllum* Merr. & L.M. Perry ● – SYZY.MG
- 108 *Syzygium zeylanicum* (L.) DC. – SYZY.ZL
- 109
- 110 OLACACEAE
- 111 *Strombosia ceylanica* Gardner – STRM.CEY
- 112
- 113 OLEACEAE
- 114 *Chionanthus crispus* Kiew ● – CHIO.CR
- 115 *Chionanthus laxiflorus* Blume – CHIO.LX

- 116 *Chionanthus ramiflorus* Roxb. – CHIO.RM
- 117
- 118 OXALIDACEAE
- 119 *Sarcotheca diversifolia* (Miq.) Hallier f. – SAR.DIV
- 120 *Sarcotheca glauca* (Hook.f.) Hallier f. ● – SAR.GLC
- 121
- 122 PENAEACEAE
- 123 *Dactylocladus stenostachys* Oliv. ● – DAC.STE
- 124
- 125 PHYLLANTHACEAE
- 126 *Antidesma coriaceum* Tul. – ANT.COR
- 127 *Baccaurea bracteata* Muell.Arg. var. *bracteata* – BAC.BRT
- 128 *Baccaurea* sp.- BAC.SP
- 129 *Glochidion kerangae* Airy Shaw ● – GLOC.KR
- 130
- 131 POLYGALACEAE
- 132 *Xanthophyllum amoenum* Chodat – XANTHO.A
- 133
- 134 RUBIACEAE
- 135 *Gaertnera vaginans* (DC.) Merr. subsp. *Junghuhniana* (Miq.) Beusekom – GAET.VG
- 136 *Gardenia chanii* Y.W. Low ● – GARD.CH
- 137 *Psydrax* sp. – PSYD.SP
- 138 *Timonius flavescens* (Jack) Baker *sens. lat.* – TIM.FLA

139

140 RUTACEAE

141 *Tetractomia tetrandra* (Roxb.) Merr. – TET.TET

142

143 SAPINDACEAE

144 *Guioa bijuga* (Hiern) Radlk. – GUI.BIJ

145 *Nephelium lappaceum* L. var. *lappaceum* – NEPH.LP

146

147 SAPOTACEAE

148 *Madhuca curtisii* (King & Gamble) Ridl. – MAD.CUR

149 *Madhuca eriobrachyon* P. Royen – MAD.ERI

150 *Planchonella obovata* (R.Br.) Pierre – PLAN.OB

151

152 STEMONURACEAE

153 *Stemonurus malaccensis* (Mast.) Sleumer – STEM.ML

154 *Stemonurus umbellatus* Becc. – STEM.UM

155

156 THYMELAEACEAE

157 *Gonystylus bancanus* (Miq.) Kurz – GONY.BAN

158

159 **Additional plants recorded.**

160 DILLENACEAE

161 *Dillenia suffruticosa* (Griff.) Martelli

162

163   LEGUMINOSAE-MIMOSOIDEAE

164   *Acacia longifolia* (Andrews) Willd

165   *Acacia mangium* L.

166

167   MYRTACEAE

168   *Tristaniaopsis obovata* (Benn.) Peter G. Wilson & J.T. Waterh.

169

170   OCHNACEAE

171   *Brackenridgea palustris* Bartell subsp. *Palustris*

172

173   PODOCARPACEAE

174   *Podocarpus* sp.

175

176   RUBIACEAE

177   *Ixora caudata* Bremek ●

178
